# Supplementary material
Source: publisher site journal article supplement (https://www.spandidos-publications.com/7503/downloadSupplementary)
Supplement: Supplementary file 1 [file downloadSupplementary]

Table SI. RT-qPCR details.

| RT-qPCR step         | Kit information                                                                |
|----------------------|--------------------------------------------------------------------------------|
| Total RNA extraction | PureZOL RNA isolation reagent (Bio-Rad Laboratories, Inc.)                     |
| DNA synthesis        | iScript™ cDNA Synthesis Kit (with random primers) (Bio-Rad Laboratories, Inc.) |
| qPCR                 | SYBR® Green Realtime PCR Master Mix (Toyobo Co., Ltd.)                         |

RT-qPCR, reverse transcription-quantitative polymerase chain reaction.

Table SII. Information of included healthy controls and patients with NSCLC.

| Item               | Healthy controls (n=20) | Patients with NSCLC (n=125) | P-value |
|--------------------|-------------------------|-----------------------------|---------|
| Age, years         |                         |                             | 0.384   |
| Median             | 54.5                    | 57                          |         |
| Range              | 45-69                   | 29-80                       |         |
| Mean               | 55.5                    | 57.1                        |         |
| Standard deviation | 5.2                     | 12.3                        |         |
| Sex, n (%)         |                         |                             | 0.714   |
| Male               | 10 (50)                 | 68 (54)                     |         |
| Female             | 10 (50)                 | 57 (46)                     |         |

NSCLC, non-small cell lung cancer.
